# Supplementary material
Source: Springer Nature journal article supplement (http://www.nature.com/nature/journal/v446/n7138/extref/446847a-s1.pdf)
Supplement: 446847a-s1.pdf [file 446847a-s1.pdf]

# LES CANDIDATS RÉPONDENT

L'élection présidentielle en France intervient dans un climat de profonde réflexion sur la place et les perspectives de la recherche française. Pour approfondir le débat, **Declan Butler**, grand reporter à *Nature*, a soumis une liste de questions aux trois principaux candidats.

## **La science française est-elle en déclin ? Pourquoi ? Combien allez-vous investir dans la science ? Quand ? Selon quelles priorités ?**

**Nicolas Sarkozy :** Il est vrai que différents signaux nous alertent depuis quelques années sur l'érosion de la position relative de la science française dans le monde. La France n'en continue pas moins d'aligner des compétences au meilleur niveau international dans différents domaines. Je pense en particulier aux mathématiques, à la physique, aux sciences de l'ingénieur. J'observe également que la France exporte des compétences scientifiques à l'étranger, même si je regrette qu'un nombre croissant de nos jeunes chercheurs fasse le choix de l'expatriation parce qu'ils estiment ne plus pouvoir réussir dans notre pays.

Il est temps d'engager les réformes indispensables à la dynamisation de nos capacités de recherche et d'investir plus massivement dans les champs prioritaires que sont pour moi les sciences du vivant, les nanotechnologies, les technologies de l'environnement et l'énergie. Au-delà, il est essentiel que nous confortions l'excellence de notre recherche fondamentale qui conditionne sur le moyen et le long terme notre potentiel d'innovation.

L'enseignement supérieur et la recherche seront bien au premier rang de mes priorités. Cette priorité se concrétisera par des moyens supplémentaires, 4 milliards d'euros en plus pour la recherche et 5 pour l'enseignement supérieur, mais aussi par des réformes en profondeur de l'organisation et du fonctionnement de notre système. Une réforme sans moyens serait aussi stérile que des moyens sans réforme.

C'est ainsi que je veux favoriser la constitution d'universités puissantes et autonomes, replacées au centre de notre effort de recherche, et renforcer la culture de l'évaluation des travaux scientifiques en favorisant les financements sur projet. L'aménagement et la structuration du Plateau de Saclay seront par ailleurs l'un des grands chantiers présidentiels. Ce site au sud de Paris, unique en Europe de par la formidable concentration de centres de formation et de recherche qui y sont implantés est aujourd'hui insuffisamment exploité.

**Ségolène Royal :** Je ne pense pas qu'il soit juste de parler de déclin, car la France conserve des atouts et des chercheurs universitaires de renom, comme dans les mathématiques.

Mais, depuis plusieurs années, la France n'a pas réellement donné la première priorité à l'université et à la recherche. La programmation des emplois engagés par Monsieur Jospin a été supprimée, les crédits budgétaires ont stagné, les doctorants et les jeunes chercheurs n'ont pas été soutenus et la complexité du système de recherche s'est aggravée. La France a reculé de la 5<sup>ème</sup> à la 11<sup>ème</sup> place des pays de l'OCDE, en ce qui concerne l'effort de R&D. Je veux inverser la vapeur, donner la première priorité budgétaire à l'enseignement supérieur, à la recherche et à l'innovation en augmentant de 10% le budget, chaque année, pendant cinq ans.

**François Bayrou :** Il ne s'agit pas tant de déclin de la science en France que d'une augmentation des investissements dans la recherche par d'autres pays comme les Etats-Unis, le Japon, l'Europe du nord et maintenant la Chine, de façon continue depuis des années. Les budgets de la recherche ont stagné en France trop longtemps. En dépit de cette situation, les scientifiques français figurent encore parmi les tous premiers dans de nombreuses disciplines, à commencer par les mathématiques, certains aspects de la physique, de la chimie, de la biologie, des sciences humaines ou des sciences de l'environnement. Il est maintenant urgent d'investir dans les domaines émergents. Je propose un nouvel investissement du pays dans la recherche, avec un accroissement des financements de 5% en euros constants, chaque année pendant dix ans.

## **Les manifestations de 2004 ont mis en évidence la désillusion des jeunes chercheurs par rapport à leur salaire et à leur carrière dans la recherche. Qu'allez-vous faire pour rendre les carrières scientifiques plus attrayantes ? Allez-vous maintenir le statut de fonctionnaire des chercheurs, c'est-à-dire avec un contrat à vie ? Comptez-vous mettre en place un système de post-doc comme cela existe dans les autres pays ?**

**Mme Royal :** Pendant les cinq années où Monsieur Sarkozy était au pouvoir, quatre ministres de la recherche se sont succédés. Sous la pression de la communauté scientifique, ils ont pris des engagements en 2004 mais ne les ont pas tenus dans la loi de 2006. Ce que demandent nos jeunes, qui acceptent bien sûr que leur travail soit évalué, c'est une visibilité à long

terme, des moyens de travailler, la reconnaissance du doctorat, des perspectives d'entrée à l'université dans les organismes de recherche ou dans le secteur privé après un poste de doctorat. Je favoriserai le développement des recherches originales avec prise de risques, tout en privilégiant l'emploi stable, comme chez nos partenaires.

**M. Bayrou :** Le mouvement des chercheurs de 2004 était bien plus large qu'une simple protestation : il a révélé à l'opinion publique combien l'investissement dans la recherche était négligé et la recherche précarisée. La science est au coeur de l'avenir de notre société. Et cela commence dès l'école primaire.

Quant aux jeunes chercheurs, leur rémunération est actuellement beaucoup trop basse. Et un système de post-doc reste nécessaire comme dans tous les pays : c'est une formation complémentaire, qui précède une entrée plus définitive dans l'industrie ou dans la recherche publique. Le retour des post doc de l'étranger sera facilité et leur intégration dans la recherche ou dans les entreprises innovantes développée. Les carrières devront ensuite faciliter les passages entre l'enseignement, la recherche et l'économie.

**M. Sarkozy :** Le mouvement social de 2004, et les états généraux de la recherche qui ont suivi, ont montré que les chercheurs, loin de redouter le changement, le réclamaient. Leurs aspirations ne portent pas que sur les questions de salaires, mais c'est à l'évidence un élément essentiel de la reconnaissance de leur apport à la société et de l'attractivité des filières scientifiques et technologiques. La revalorisation des carrières de ceux qui se consacrent à la recherche scientifique est donc pour moi un impératif.

Je veux mettre fin à la situation indigne qui est faite aux jeunes chercheurs, doctorants et mettre en place une vraie politique post-doctorale en France. Après confirmation de leur potentiel, la revalorisation des rémunérations doit aussi s'opérer selon des critères prenant mieux en compte le mérite, la qualité des travaux scientifiques et les résultats obtenus. Je souhaite faire tomber les cloisonnements archaïques qui séparent en France chercheurs et enseignants-chercheurs. Chacun au cours de sa carrière doit comme dans la plupart des autres pays développés pouvoir se consacrer librement et à des degrés variables aux missions de recherche et d'enseignement.

**La classe dirigeante française, tant au sein des entreprises que du gouvernement, est dominée par des diplômés, non de l'université, mais des Grandes Ecoles, spécialisés dans le commerce, l'administration publique, l'ingénierie mais non dans les sciences. Comment allez-vous réconcilier ce système d'éducation à deux têtes afin que la valeur et les compétences des docteurs soient mieux reconnues ?**

**M. Bayrou :** L'enseignement supérieur de chaque pays résulte de son histoire. Faut-il tout refonder ? Je préfère une évolution forte, dont le premier pas est la reconnaissance du doctorat : celui-ci doit devenir un diplôme reconnu à l'embauche, comme cela se pratique dans le monde et être intégré dans le droit du travail. Ainsi les docteurs seront-ils à part entière les cadres de notre pays, dans les entreprises, l'administration, le monde politique et les médias.

Plutôt qu'opposer les filières de formation, je préférerais une politique où l'on atténuerait la différence entre filières de formation, par exemple en développant les passerelles qui existent déjà à tous les étudiants méritants de toutes les filières, au niveau du master ou du doctorat ou encore que les écoles et l'université constituent des cursus communs. La politique d'enseignement supérieur et de recherche veillera, notamment lors de l'attribution des soutiens publics, au respect de ces objectifs.

**M. Sarkozy :** Les docteurs seront pleinement reconnus quand l'université française disposera enfin des moyens financiers et de l'autonomie nécessaire pour s'affirmer comme une filière d'excellence, ce qu'elle est déjà d'ailleurs pour le droit, la médecine et l'économie.

Les grandes écoles et les universités sont complémentaires et nous devons valoriser davantage demain ces complémentarités. Des salaires décentés pour les doctorants devraient inciter plus d'élèves de grandes écoles à choisir la formation par la recherche. Il est important que la recherche pénètre davantage dans les grandes écoles et que les meilleurs étudiants des universités puissent accéder à celles-ci. Il faut associer étroitement universités et grandes écoles géographiquement proches dans des campus avec des services partagés. Les grandes écoles pourront faire bénéficier les universités de leur savoir-faire en matière de relations avec les entreprises et d'accès de leurs élèves aux emplois de responsabilités qu'elles proposent. Je souhaite que les docteurs puissent accéder à d'autres débouchés que la recherche et l'enseignement. L'expérience professionnelle doctorale doit pouvoir ouvrir la voie à des responsabilités élevées dans l'administration et les entreprises.

**Mme Royal :** Je me suis engagée pour une reconnaissance du diplôme de docteur (PhD) tant dans la fonction publique qu'au sein des branches professionnelles. Il faut par ailleurs

rapprocher les différentes filières de formations supérieures, établir des passerelles entre écoles et universités. C'est le rôle qui sera dévolu aux Pôles d'Enseignement Supérieurs et de Recherche (PRES) qui mettront en interaction et synergie universités, grandes écoles et organismes de recherche.

**La science française est-elle irréformable ? Comment comptez-vous réussir, alors que les gouvernements successifs ont échoué à impulser des changements ? L'Agence Nationale pour la Recherche et le Haut Conseil de la science et la technologie, nouvellement créés, sont-ils des bases solides pour initier d'autres réformes ?**

**M. Sarkozy :** Non la science française n'est pas « irréformable » ! Je pense même qu'elle n'a jamais été aussi mûre pour les réformes. Il y a une prise de conscience qui s'est transformée en demande de changement. Les universitaires et les chercheurs, eux aussi confrontés à la mondialisation et à la compétition internationale, voyagent beaucoup dans le cadre de leurs missions. Ils comparent !

N'oubliez pas, outre l'ANR et le Haut Conseil, la création des pôles de compétitivité que j'ai initiée : ce sont des clusters où coopèrent étroitement entreprises, laboratoires et universités autour de projets communs. Je veux renforcer le rôle de l'ANR ainsi que la qualité de ses procédures d'évaluation pour privilégier la recherche sur projets. Je souhaite tripler le financement sur projets de la recherche en France.

**M. Bayrou :** C'est un mauvais procès à la recherche française, car j'ai mesuré sa volonté de sortir de l'impasse où elle se trouve. Il faut d'abord que la recherche redevienne prioritaire dans l'agenda politique, que les plus hauts responsables de la politique française en fassent un devoir personnel. Un accord sera proposé sur une base non partisane, rassemblant les grandes forces politiques, qui sont conscientes qu'un investissement majeur est nécessaire. Les questions plus détaillées, celles de l'organisation de l'exécutif comme celle du rôle du Parlement, ou celle de l'autonomie des Universités et de l'évaluation pourront alors trouver des solutions simples et transparentes, car il sera facile de vérifier en quoi l'organisation mise en place répond à un besoin et facilite la contribution des scientifiques français aux questions communes du pays et de l'humanité. L'urgence d'agir s'impose.

**Mme Royal :** La véritable question est : de quelle réforme la science française a-t-elle besoin ? Le malheur c'est que depuis les gouvernements de droite n'ont pas donné la priorité à la recherche. Les étudiants sont descendus dans la rue en 1986, en 1995, les chercheurs en 2004, car ils refusaient la paupérisation de l'université et le déclin.

La recherche française a besoin de simplification, de cohérence, de transparence. Il faut redonner confiance aux jeunes pour qu'ils s'engagent dans les filières scientifiques. Mais la recherche française a besoin de financements, de personnes et de structures dans des contrats pluriannuels passés à moyen terme avec les universités et les organismes de recherche. L'Agence Nationale doit, en complément comme dans tous les pays comparables, financer la pluridisciplinarité, aider au partenariat entre la recherche publique et privée, soutenir les coopérations internationales.

**Alors que la plupart des autres pays distribuent les fonds en fonction de l'excellence scientifique des projets, ces fonds sont en France donnés principalement à des organisations de recherche, tel que le CNRS, qui les répartit ensuite à ses propres laboratoires. Quel équilibre voyez-vous entre ces deux types de financement ? Quel avenir pour le CNRS ?**

**M. Bayrou :** Cette question ne reflète pas la réalité. La recherche financée par les institutions et celle décidée et financée par projet ne sont pas différentes, car elles sont réalisées par les mêmes chercheurs. Elles sont complémentaires et le critère doit être dans tous les cas la qualité, que les appels d'offre soient français ou européens. Il n'y a donc pas de règle d'équilibre a priori, ce qui rend la politique scientifique vivante et adaptable. Il faudra toutefois veiller à ce que le nombre des guichets cesse de croître. Quant au CNRS, son apport dans la recherche n'est plus à démontrer, on se presse à ses portes (y compris les 20% étrangers qui y sont recrutés), et les laboratoires sont présents dans la plupart des recherches.

**Mme Royal :** Le principe même de nos organismes comme le CNRS est d'évaluer des projets scientifiques sur la base de l'excellence et d'intégrer ces projets au sein d'ensemble d'équipes travaillant en synergie, les laboratoires. Il faut donc donner aux établissements de recherche les moyens de leur politique de soutien aux meilleures équipes reconnues par une évaluation scientifique rigoureuse qui doit intégrer la dimension européenne au sein de son expertise.

**M. Sarkozy :** Je souhaite clairement que l'université ne soit plus à la périphérie mais au centre de notre effort de recherche. Je ne conteste pas le fait que les grands organismes que sont le CNRS, l'INRA ou l'INSERM conservent un réseau de laboratoires propres, par exemple lorsqu'il s'agit de gérer des grands équipements ou de mener des recherches de pointe sur des thématiques spécifiques. Mais ils devront se repositionner clairement sur leurs missions d'agence de moyens finançant sur projets les meilleures équipes de recherche dans les universités. L'excellence scientifique

doit être financée massivement et en priorité.

**L'Allemagne a récemment lancé une Initiative d'Excellence, avec un budget de plusieurs milliards d'euros, pour relever le statut international de ses universités. Que comptez-vous entreprendre pour moderniser les universités françaises en ruine ? Doivent-elles devenir la colonne vertébrale de la recherche publique comme dans la plupart des autres pays développés ?**

**Mme Royal :** Nous devons respecter notre propre histoire et avancer avec nos partenaires vers une meilleure intégration européenne. Une chose est sûre : il faut sortir l'université française de sa misère et hisser la recherche menée au sein des PRES au meilleur niveau international. Le regroupement d'universités rendra plus visibles leurs points de force et améliorera leur classement international.

Je prône une logique d'utilisation optimale des moyens, fondée sur l'évaluation, ce qui nécessite de donner des conditions de travail favorables à tous les enseignants-chercheurs qui sont engagés dans la recherche. Se limiter à soutenir une petite partie d'entre eux voudrait dire qu'on paie les autres sans profiter de leur potentiel de recherche : ce serait absurde.

**M. Sarkozy :** Dès le lendemain de l'élection, je suis prêt à mettre en chantier une grande réforme des universités françaises destinée à leur donner beaucoup plus d'autonomie (pouvoir recruter, moduler les salaires, fixer leur organisation, disposer du patrimoine, diversifier les financements) et à refonder leur mode de gouvernance en restructurant les conseils d'administration et le mode de désignation des présidents.

Ces réformes indispensables auront un coût, ne serait-ce que parce que nous devons rattraper tout le retard d'investissement qui a été accumulé depuis plusieurs années. Le budget de l'enseignement supérieur sera ainsi augmenté de moitié. Un effort sans précédent sera également déployé en direction de l'amélioration des conditions de vie et de travail des étudiants et des enseignants-chercheurs.

**M. Bayrou :** La place de l'Université devra être fortement revalorisée, car après l'augmentation massive des étudiants depuis 20 ans, stabilisée aujourd'hui, il devient possible d'ouvrir une nouvelle étape à long terme. L'université souffre de trois maux : l'absence de reconnaissance du doctorat, déjà évoquée, un manque de financement, et une gouvernance mal adaptée.

Il faudra atteindre une dépense par étudiant égale à la moyenne de celle des pays de l'OCDE, continuer le rapprochement amorcé avec les grandes écoles et décider un changement de gouvernance. Et les initiatives comme la fusion des Universités à Strasbourg, prévue pour 2009, seront saluées et encouragées. Elles ne

peuvent conduire qu'à la visibilité de la France et à l'amélioration de sa recherche.

**La faiblesse de la recherche française est l'innovation. L'investissement du secteur privé a stagné depuis 1990, en dépit des nombreuses actions et aides de l'état, comme les crédits d'impôts, les pôles d'innovation et les réseaux régionaux. L'engagement de l'Etat est à l'origine de l'excellence française dans les secteurs de l'aérospatial, du nucléaire et du transport. Mais ces « innovations par décret » sont-elles compatibles avec des secteurs qui évoluent rapidement comme les biotechnologies et les technologies de l'information ?**

**M. Sarkozy :** Les pôles de compétitivité que j'ai mis en place dans mes différentes responsabilités gouvernementales sont encore très jeunes. Mais le premier bilan que nous pouvons en tirer est plutôt encourageant. J'appelle votre attention sur le fait qu'il s'agit d'une démarche relativement novatrice, en tout cas pour la France. Ces pôles ne sont pas décidés d'en haut mais définis sur la base de stratégies sectorielles et territoriales définies par les acteurs de terrain. L'Etat a donné l'impulsion fondamentale et apporte son soutien financier, c'est tout. Comme vous dites en Grande-Bretagne, c'est une approche « bottom up » et non « top-down ».

Plus que les incitations financières de tous ordres, c'est avant tout la qualité de la recherche et le dynamisme de ses canaux de diffusion qui sont déterminants pour notre potentiel d'innovation. La constitution de campus universitaires et de recherche puissants et autonomes y contribuera. Ce sont là les creusets de la circulation des idées et des compétences et pour la rencontre entre les savoirs et les entreprises. Mais soyons pragmatiques, partout dans le monde, dans les pays émergents comme dans les pays développés qui affichent un discours très libéral, les pouvoirs publics interviennent pour encourager l'innovation et pour bâtir et conforter des filières industrielles et technologiques d'avenir.

**Mme Royal :** Il faut arrêter de changer sans arrêt de cadre de référence et simplifier. Les mesures comme le crédit d'impôt-recherche doivent être mieux évaluées, l'accès au marché des capitaux pour le développement des 2ème ou 3ème tour de financement amélioré par le recours à une fraction de l'épargne défiscalisée (assurance-vie). Aujourd'hui, l'essentiel des aides profite aux grands groupes, il faut mieux aider les PME.

L'innovation a stagné parce que la recherche fondamentale n'a pas été soutenue. Les politiques volontaristes des années 60 ont conduit au développement de l'espace, de l'aéronautique ou du nucléaire civil. La panne dans le domaine des biotechnologies, alors que plusieurs laboratoires français étaient en pointe dans le décryp-

tage du génome, est venu du manque criant de soutien aux sciences de la vie, il y a dix ans. Les politiques de droite voient à court terme, alors que pour préparer l'avenir, nous devons nous projeter sur le long terme. Mais cela ne pourra se développer que si les entreprises emploient des docteurs, qui sont les mieux à même de saisir les opportunités d'innovation en suivant l'évolution de la recherche. J'aiderai les entreprises qui embauchent des docteurs.

**M. Bayrou :** Je veux soutenir l'ensemble de l'« écosystème français de l'innovation » car il porte en lui les germes d'une grande partie de notre industrie de demain. Certaines technologies (Biotechnologies, Télécommunications, Electronique, Nanotechnologies, Logiciel...) mobilisent largement les différents acteurs de cet écosystème (chercheurs, organismes de valorisation, entrepreneurs, investisseurs privés et institutionnels, conseils spécialisés...). Pour aider ce secteur, c'est l'ensemble de cet écosystème que je propose de soutenir et de valoriser.

Si la recherche n'est pas l'innovation, elle peut et doit y contribuer. Plusieurs directions doivent être favorisées : les chercheurs contribueront à notre croissance et notre compétitivité en s'intéressant à la valorisation de leurs travaux. Pour attirer les talents, je propose d'exempter d'impôt les revenus des brevets des chercheurs installés en France. Je souhaite renforcer les départements de valorisation de nos instituts de recherche (quelques centaines de millions d'euros peuvent avoir à ce niveau un impact considérable) pour faciliter la naissance et le développement des entreprises innovantes.

Pour libérer l'industrie, il faut poser le « principe de confiance » face aux entrepreneurs qui osent prendre des risques. Je mettrai en place une grande loi pour les PME innovantes (Small Business Act, extension du statut actuel de JEI jusqu'à la preuve de concept, mise en place de la JEC...). Enfin j'accroîtrai les financements de façon substantielle mais simplifiée, notamment en facilitant l'investissement des personnes privées) et en favorisant le capital-risque.

**Quelles sont vos ambitions pour la construction d'un Espace européen de la Recherche ? Quel doit être son impact sur la recherche nationale et les choix d'innovation ?**

**Mme Royal :** En faire un budget prioritaire serait reconnaître son véritable rôle moteur dans la construction européenne. Nous affirmerons donc l'engagement de la France dans la construction de l'espace européen de la recherche et de l'innovation.

En ne consacrant que 1,85 % du PIB à la recherche, l'effort européen est 50 % moindre que celui des Etats-Unis et du Japon. Nous agirons pour que cette priorité à la recherche soit marquée dès la révision du cadre budgétaire de l'Union européenne de 2008/2009, en plaidant

pour un rééquilibrage en faveur des dépenses d'avenir. Je demanderai ainsi au niveau de l'Union Européenne que les dépenses publiques de Recherche & Développement ne soient plus incluses dans les critères du pacte de stabilité et de croissance.

L'Europe doit aussi soutenir la recherche fondamentale qui constitue le socle indispensable des futures technologies de pointes innovantes pour notre économie. Les structures de recherche et d'innovation en France doivent se développer avec nos partenaires européens, en appliquant la charte européenne du chercheur, et en soutenant l'Agence européenne de financement de la recherche, l'ERC.

Je souhaite favoriser l'Europe de la science par la « base » en renforçant les coopérations, en construisant des réseaux entre les laboratoires et les établissements et en développant des collaborations transfrontalières.

**M. Bayrou :** Cette question devrait être en tête, tant l'Europe est la réponse adaptée comme espace scientifique. Je proposerai, si je suis élu Président de la République, une initiative pour que la recherche devienne une compétence partagée entre l'Union et les Etats. Il est évident que le budget européen de la recherche est inadapté aux besoins. Nous avons soutenu au Parlement européen un doublement de ce budget pour le prochain programme cadre (7e PCRD), comme proposé par la Commission européenne, mais hélas le conseil des ministres des gouvernements européens l'a amputé de moitié...

Le problème vient évidemment du refus de la majorité des gouvernements européens (y compris de la France) d'augmenter le budget global de l'Union (qui n'est que d'à peine plus d'1% de son produit intérieur brut). Il est impossible sans augmentation de faire face à nos obligations internationales, de soutenir les pays entrants dans l'Union, de maintenir les politiques existantes et de donner à la recherche l'impulsion qu'elle mérite. Si nous le faisons, l'Europe deviendra, comme au CERN, la terre d'accueil que nous souhaitons.

**M. Sarkozy :** L'espace européen de la recherche et les objectifs de Lisbonne sont des horizons fondamentaux pour l'Union Européenne. Mais les budgets de recherche transitant par le budget de l'Union, représentent à peine 5% des dépenses totales de recherche en Europe. Et la gestion encore trop bureaucratique de ces moyens décourage parfois les meilleures volontés.

L'espace européen de recherche est pourtant un espace essentiel pour deux raisons : d'abord, pour les projets lourds qui demandent une masse critique qu'un pays seul ne peut atteindre ; ensuite, pour distinguer l'excellence à l'échelle d'un continent plutôt que dans le périmètre étroit de chaque pays.

Je souhaite donc la création d'une agence européenne de la recherche et de l'innovation qui d'une part attribuera des dotations

de recherche fondamentale sur critères d'excellence, sans la lourdeur bureaucratique des programmes actuels, et d'autre part financera les grands projets industriels innovants qui seront les Airbus et les Ariane du XXIème siècle. Dans les deux cas, cette agence doit avoir la capacité de faire des choix libres par rapport à la recherche obsessionnelle du taux de retour national qui empoisonne aujourd'hui EADS et Galileo.

**D'ici à 2050, le Royaume Uni prévoit de diminuer de 60% sa production de gaz à effet de serre. Sur quel taux allez-vous engager la France ? Comment ferez-vous pour l'atteindre ? Quelles obligations internationales doivent être choisies pour l'après Kyoto ?**

**M. Bayrou :** La France a signé Kyoto, et les quotas d'émission de l'industrie sur le territoire français sont aujourd'hui stabilisés. J'assumerai l'engagement européen de mars 2007 d'avoir 20% d'énergie d'origine renouvelable.

Mais il faudra faire encore davantage, par les économies d'énergie et les nouvelles technologies, par exemple dans la construction, secteur qui sait déjà édifier des bâtiments sans émission. Ceci créera de plus des emplois locaux. Enfin, il faudra davantage de recherche pour améliorer notre compréhension des phénomènes climatiques, et développer un programme vigoureux de technologies efficaces contre l'effet de serre.

**M. Sarkozy :** Je suis fier de pouvoir dire que la France a fait un choix visionnaire en s'engageant il y a plusieurs décennies dans le développement d'un programme électronucléaire. Cela lui procure aujourd'hui davantage de sécurité dans ses approvisionnements énergétiques et lui permet de réduire ses émissions. Songez que le parc nucléaire français permet d'économiser à la planète l'équivalent du rejet des automobiles circulant dans toute l'Europe.

Le nucléaire reste indubitablement l'énergie de l'avenir pour lutter contre l'effet de serre. Bien sûr, nous avons aussi inscrit parmi nos priorités scientifiques et technologiques la recherche sur les énergies renouvelables et les modes de production et de transport plus économes en énergie. Quant aux traités internationaux, soyons pragmatiques et veillons déjà à ce que l'ensemble des pays adhèrent aux traités existants et notamment à celui de Kyoto.

L'Europe, qui représente un marché de 500 millions de personnes, devra se mobiliser davantage pour inciter ses grands partenaires commerciaux, notamment la Chine, les Etats-Unis et le Canada, à jouer davantage le jeu de la planète. Les pays qui ont un comportement de passager clandestin et qui ne font aucun effort de réduction des émissions, ne doivent continuer à en tirer un avantage concurrentiel dans le domaine industriel. Pour compenser cela il faudra taxer les produits des pays qui ne

feront aucun effort de limitation des émissions après 2012, quitte à modifier les traités OMC existants.

**Mme Royal :** Je me suis engagée à diminuer par quatre les émissions de gaz à effet de serre en 2050. C'est une politique ambitieuse, car je suis persuadée que le réchauffement climatique est le défi majeur du XXIème siècle. Pour cela, je préconise des économies d'énergie dans le secteur de l'habitat et des transports, le développement des énergies renouvelables (solaire thermique et photovoltaïque, éolien, biomasse, géothermie), le développement de la recherche dans le domaine énergétique (captation et stockage en couche profonde de gaz carbonique, stockage de l'électricité, filière hydrogène, réseaux électriques intelligents, obtentions de nouveaux carburants par hydrolyse de la biomasse).

Je pense qu'il est important que les pays qui produisent le plus de gaz carbonique (Etats-Unis, Australie, Canada) rejoignent la table des négociations pour préparer l'après Kyoto et s'engagent dans une voie de sobriété énergétique, nécessaire au développement des pays en émergence comme l'Inde ou la Chine.

**Allez-vous continuer à produire ¼ de l'électricité française à partir de l'énergie nucléaire ? Quelle est votre stratégie pour l'EPR et les réacteurs de la prochaine génération ? Que comptez-vous faire face à l'accumulation des déchets nucléaires ?**

**M. Sarkozy :** La filière nucléaire est pour nous une filière industrielle et technologique d'excellence tout à fait stratégique. La France est par ailleurs l'un des seuls pays à maîtriser l'ensemble du cycle du combustible nucléaire. La France continuera à faire prospérer son avantage comparatif en la matière en modernisant son parc et en améliorant son savoir-faire. C'est pourquoi nous avons décidé de lancer le chantier du réacteur de 3ème génération, EPR, et d'engager sans attendre un programme de recherche sur les générateurs de 4ème génération. Cela nous permettra d'intensifier le rendement de l'énergie nucléaire tout en optimisant encore la sécurité et la production de déchets.

**M. Bayrou :** La poursuite du programme nucléaire n'est pas contradictoire avec le développement des énergies renouvelables, en raison d'un besoin d'énergie croissant. Le nucléaire ne contribue pas à l'effet de serre, et c'est une bonne raison de ne pas le réduire. Le projet EPR sera donc poursuivi et une nouvelle génération mise à l'étude. La filière nucléaire de production d'électricité fait partie des instruments énergétiques indispensables et de nos atouts pour lutter contre l'effet de serre.

Mais nous avons besoin d'une expertise scientifique sur l'EPR. Derrière ce projet se pose la question du renouvellement de nos réacteurs actuels. Une décision aussi structurante pour

notre politique énergétique ne peut donc pas se prendre en catimini, mais à l'issue d'un débat le plus large et le plus démocratique possible.

Le projet ITER (fusion) localisé en Europe à Cadarache sera soutenu. S'agissant de lourds investissements à vocation mondiale, la part du financement européen devrait s'accroître.

Le traitement des déchets est une priorité : il faut lancer rapidement une démonstration de traitement après un stockage temporaire. Ceci prouvera que les déchets peuvent être ramenés, en volume comme en capacité radioactive, à des seuils très bas, de façon à rassurer les hommes et femmes, nombreux en France et dans le monde, qui doutent de cette forme d'énergie en raison des risques qu'elle comporte encore.

**Mme Royal :** J'ai placé l'excellence environnementale au cœur de mon programme. Je m'engage à augmenter la part des énergies renouvelables pour qu'elles représentent 20% de la production primaire d'énergie en 2020. Cet effort associé à un programme ambitieux d'économie d'énergie nous permettra de réduire notre dépendance aux énergies fossiles. Cette politique doit également permettre d'abaisser la part d'électricité d'origine nucléaire.

La France s'est dotée d'une loi sur les déchets nucléaires, afin de tester toutes les solutions possibles, entreposage, stockage réversible, vitrification, inertage, transmutation. Je serais particulièrement attentive pour garantir la réversibilité du stockage des déchets nucléaires. Le Parlement décidera dans dix ans des options qui devront être retenues pour la gestion de ces déchets sur le long terme.

Je considère que la décision de lancer l'EPR a été prise par le gouvernement actuel dans des conditions d'analyse et de débat tout à fait contestables. Au Parlement, aucune étude d'impact n'a été présentée, et rien n'a été fait pour une réelle diversification de notre mix énergétique. On ne peut engager l'avenir énergétique de notre pays sans un débat approfondi non seulement sur l'EPR mais sur l'ensemble du dossier.

J'engagerai donc ce débat en mobilisant les citoyens et les acteurs économiques sur trois objectifs qui doivent être conciliés : consommer moins d'énergie, car l'énergie la moins polluante est celle que l'on ne consomme pas ; développer de manière volontariste les filières d'énergies renouvelables, y compris en décentralisant en proximité leur production ; examiner l'avenir de l'énergie nucléaire. Dans le même temps nous poursuivrons les recherches sur les réacteurs nucléaires de nouvelle génération.

**La France doit-elle continuer à avoir sa propre force nucléaire dissuasive ainsi que l'appareil de recherche allant avec de telles responsabilités ? Pouvez-vous envisager, qu'un jour, l'Europe ait une force dissuasive commune ?**

**M. Bayrou :** Avant d'être une question sur la

recherche, celle-ci concerne l'Europe politique et sa vocation dans le monde. Pour la France, et pour sortir de la crise européenne où nous sommes, un traité nouveau, simplifié et compréhensible par chacun doit être élaboré, puis proposé par referendum, car le peuple seul peut défaire ce qu'il a fait. Je soutiendrai l'engagement récemment pris à Berlin d'une solution avant juin 2009. Dans ce cas, la diplomatie et la défense de l'Europe, donc la politique de dissuasion y tiendront une place, ainsi que la R&D qui lui est nécessairement associée.

Mais à long terme, l'Europe doit aussi proposer au monde le modèle de paix qu'elle a su construire depuis 50 ans. Le désarmement doit devenir l'une des règles, pour que le monde multipolaire et multiculturel où vivront nos descendants ne soit pas celui de la guerre ou du risque d'une déflagration mondiale.

**Mme Royal :** La politique de dissuasion nucléaire sera maintenue.

Nous agissons avec vigilance et fermeté dans le cadre international pour éviter la prolifération des armes de destruction massive. Je suis par ailleurs très favorable à la construction d'une politique européenne de défense.

**M. Sarkozy :** La France doit veiller à conserver son indépendance nationale en matière de dissuasion nucléaire. C'est l'assurance-vie de notre nation et la garantie ultime contre les atteintes à nos intérêts vitaux. A fortiori dans un contexte de prolifération balistique et de dissémination d'armes de destruction massive. Si je suis élu, je veillerai donc à préserver intacte la crédibilité politique, scientifique, technologique et opérationnelle de notre force de frappe.

Nos intérêts vitaux ne se limitent pas à nos frontières et nos capacités de dissuasion peuvent bénéficier à d'autres pays européens. Je suis pour ma part tout à fait prêt à envisager l'ouverture de discussions sur ce point avec nos voisins et partenaires, par exemple en vue de conforter les capacités spatiales européennes d'alerte avancée. Pourquoi Français et Britanniques ne pourraient-ils pas également se rapprocher pour développer dans le futur des programmes industriels et technologiques communs de modernisation de nos systèmes d'armes nucléaires ?

**Quelles sont vos priorités pour la recherche spatiale ? Quel équilibre voyez-vous entre la science, ses applications et les vols habités pour la station spatiale internationale et la lune ?**

**Mme Royal :** La France est une grande nation spatiale. Avec ses partenaires européens, elle a développé les lanceurs Ariane qui sont de grande qualité. Je pense que les vols habités coûtent très chers et doivent être menés grâce à des programmes de coopération internationale. Le lancement de satellites d'observation de la terre est bien sûr une priorité.

**M. Sarkozy :** L'Espace est un domaine stratégique pour l'Europe. Il est aux confluent de nombreuses applications essentielles pour notre continent, qu'il s'agisse de l'exploration scientifique, de la défense et de la sécurité, du développement de certains secteurs économiques ou de la surveillance des équilibres écologiques et du respect des engagements pris par la communauté internationale. L'Europe doit tout faire pour conserver un accès autonome à l'espace. La compétence européenne en matière de lanceurs doit être maintenue. L'Europe doit ensuite s'impliquer davantage pour acquérir une meilleure maîtrise des systèmes spatiaux de télécommunications, d'observation et de géo-localisation. A cette fin, il est urgent de débloquent le projet Galileo qui est actuellement enlisé dans des querelles nationales qui ne sont vraiment pas à la hauteur de l'enjeu.

Mais tout ne fonctionne pas mal en Europe, loin de là. Je crois que nous pouvons être fiers du travail accompli par l'ESA qui s'acquitte fort bien des missions scientifiques et d'exploration qui lui sont dévolues. Plus généralement, je suis favorable à une plus grande coopération européenne dans le domaine spatial, et la France doit être prête s'il le faut à montrer comme par le passé la voie en faisant un effort supplémentaire. L'objectif premier doit être de préserver et de conforter notre socle de compétences dans les domaines civils, militaires et scientifiques. Si ensuite, nous sommes capable ensemble de développer des projets plus ambitieux de vols habités et d'exploration planétaire, pourquoi pas ?

**M. Bayrou :** Nous devons assurer dans un cadre européen notre indépendance technologique en matière de lanceurs en préparant notamment l'après Ariane. L'accent devra aussi être mis sur la recherche fondamentale pour l'exploration de l'univers, domaine où la France et l'Europe sont compétentes, puis au pilotage de l'environnement global de la terre (GMES) et à Galileo (positionnement). Pour que l'Europe pèse suffisamment, doit-elle viser la lune ou s'associer à des explorations plus lointaines, voire les mener elle-même ? Doit-elle soutenir la station spatiale internationale ? Cela demande une réflexion.

**La France a longtemps défendu la politique agricole commune, qui pourtant est un obstacle majeur à la croissance économique des pays en voie de développement. Comment allez-vous concilier le besoin d'une solidarité internationale avec les intérêts de l'agriculture française ?**

**M. Sarkozy :** Un rendez-vous est pris en 2013 pour rediscuter de l'avenir de la PAC. Le fait que je sois attaché à ce que les équilibres actuels ne soient pas modifiés jusqu'à cette échéance ne doit pas nous empêcher de réfléchir d'ores et déjà au devenir de cette politique commune.

Mais je le dis de la façon la plus claire, l'Europe ne doit en aucun cas renoncer à son statut de puissance agricole. C'est dans son intérêt même et c'est aussi l'intérêt des pays tiers.

L'explosion démographique mondiale à venir et la réduction des surfaces arables dans certaines régions du monde sous l'effet des changements climatiques prévisibles vont augmenter les besoins alimentaires dans des proportions fortes. La question de la suffisance alimentaire de l'humanité pourrait donc se poser dans des termes nouveaux, ce qui confèrera une responsabilité plus grande encore aux zones tempérées. Comment être sûr que les prix des biens agricoles baisseront une fois que nous aurons démantelé l'agriculture européenne et que nous serons devenus dépendants de puissances comme les Etats-Unis, le Brésil ou l'Australie pour notre alimentation ?

**Mme Royal :** La France est un grand pays agricole. Et elle entend bien sûr défendre les intérêts de ses agriculteurs. Mais je souhaite, d'une part, faire évoluer notre agriculture pour la rendre plus respectueuse de l'environnement, d'autre part, favoriser le développement de l'agriculture dans les pays du Sud. Nous pouvons trouver ici des compromis gagnant-gagnant.

**M. Bayrou :** Je suis favorable à une refonte de la politique agricole commune pour aller vers une production durable, encourager la diversification de notre agriculture et la qualité. Mais l'arrivée des nouveaux pays membres, dont l'agriculture a besoin de modernisation, pèsera nécessairement sur le budget agricole commun.

Il faudra évoluer en pensant aux paysans du tiers-monde, dont les productions ne sont pas soutenues comme les nôtres, car le co-développement est la seule méthode capable d'enrayer l'émigration causée par la pauvreté, et fonder la solidarité avec les pays les plus pauvres. Et développer notre industrie agroalimentaire forte, à vocation exportatrice, créatrice d'emplois.

**Quelle sera votre politique par rapport aux organismes génétiquement modifiés, en France, en Europe et à l'Organisation mondiale du commerce ? Allez-vous modifier les lois existantes concernant les recherches sur les embryons et les cellules souches embryonnaires ?**

**Mme Royal :** Je suis favorable à un moratoire sur les cultures d'OGM en plein champ et à l'organisation d'un débat public sur cette question qui intéresse tous les citoyens.

Le compromis trouvé en 2006, autorisant par dérogation des recherches sur les cellules souches embryonnaires est en contradiction avec la loi bioéthique de 2004. La recherche sur les cellules souches humaines, obtenue après consentement éclairé, à partir d'embryons in vitro ne faisant plus l'objet d'un projet parental doit être permise, après examen rigoureux du protocole. Il faudra donc revoir le cadre légal pour concilier principes éthiques et nécessaires progrès scientifiques.

**M. Bayrou :** Le dossier des OGM est symptomatique du manque de consultation démocratique en France sur les grands sujets. Un tel débat aurait permis de faire ressortir les attentes des citoyens, d'orienter les recherches, de façon à en permettre une exploitation aval maîtrisée et acceptée. Il faut donc maintenant l'organiser, avec les contributions de scientifiques indépendants. En attendant je suis favorable à un moratoire immédiat sur les OGM. Il ne doit pas y avoir de semis en plein champ avant que nous ayons un recul suffisant sur leurs conséquences sur le milieu et sur la santé humaine.

Les questions comme celle des cellules souches, celle de plantes qui fabriquent des molécules à visée thérapeutique ou celles qui apparaîtront avec les avancées de la recherche devront être traitées selon le même principe et, le dispositif législatif étant suffisant, les comités d'éthique pourront jouer un rôle actif d'accompagnement, voire d'autorisation et de suivi des recherches à risques.

**M. Sarkozy :** En ce qui concerne les OGM, je veux que les recherches puissent se poursuivre. C'est du reste la seule façon pour améliorer notre connaissance des risques qu'ils sont susceptibles de faire courir à la santé humaine et à la biodiversité. En l'absence d'un niveau élevé de certitude sur leur innocuité, je suis en revanche plus réservé sur l'industrialisation et la commercialisation de leur production

Pour ce qui est de la recherche sur les cellules souches embryonnaires, je voudrais tout d'abord rappeler que la France a été le premier pays à se doter d'un corpus de lois de bioéthique en 1994. Ces lois ont d'emblée été considérées comme évolutives et révisables, la prochaine révision étant programmée en 2009. Il appartiendra donc au législateur d'apprécier les inflexions qui devraient être éventuellement apportées en fonction des progrès de la science et de la médecine. Avec la création de l'Agence de biomédecine, les chercheurs peuvent dès à présent soumettre leur projet de recherche : je me réjouis que les projets scientifiques favorablement évalués puissent ainsi se développer

dans notre pays avec un encadrement clair et évolutif. Là aussi, je crois indispensable que la recherche puisse continuer à se développer dans ce domaine.

Qu'il s'agisse des OGM ou des cellules souches, nous devons éviter l'obscurantisme comme le scientisme et débattre dans la transparence.

**S'il y a une question que je n'ai pas posée, qui vous semble importante et qui vous tient à coeur, n'hésitez pas à la poser et à y répondre ici.**

**M. Bayrou :** Un aspect émergent des politiques scientifiques ne doit pas rester dans l'ombre : il s'agit de l'acceptation de la science dans notre société. L'opinion, mieux formée et informée, s'interroge plus facilement sur les effets bénéfiques ou maléfiques de certaines recherches pour l'homme.

Ainsi le malade peut-il savoir beaucoup sur sa maladie grâce à l'internet et devenir un interlocuteur éduqué de son propre médecin. Dans une société technologiquement développée, ces attitudes seront plus fréquentes, et toucheront toutes les sciences. Je souhaite que l'on y porte attention : le public doit être bien informé des avancées des sciences et des techniques par l'ensemble des médias. Alors les débats qui s'y tiendront seront profitables, en toute démocratie, à l'ensemble de notre société.

**M. Sarkozy :** Que des universités françaises puissent figurer aux côtés de Cambridge et d'Oxford dans le top 10 international et que les talents français installés au Royaume-Uni, à commencer par les chercheurs, se disent qu'on leur a enfin donné des raisons de repasser le « Channel » dans l'autre sens !

**Mme Royal :** Oui vous avez oublié le rôle essentiel du débat démocratique dans un pays moderne. La science ne peut se développer hors ou contre la société. Il est essentiel de développer la culture scientifique et le débat sur les questions de science au sein de la société. Tous les citoyens doivent être associés aux avancées de la science. Cela signifie que les grandes orientations de la recherche doivent être déterminées sur la base du débat parlementaire, des recommandations d'un Haut Conseil de la Science rendu indépendant, mais aussi de conférences citoyennes. Je ferai tout pour qu'après mon élection, de nouvelles générations de jeunes chercheurs viennent nous faire profiter de leur talent et de leur enthousiasme. ■
